# Supplementary material for: Phylogeny of the tribe Sophoreae (Fabaceae, Faboideae) and taxonomy of Ammopiptanthus using plastome data
Source: Research Square preprint supplement (doi:10.21203/rs.3.rs-3300632/v1), 2023-08-31
Supplement: Supplementary file 1 [file 94dd884d5847b5fb4a4ff94b.docx]

Table S1. Comparison of *Ammopiptanthus* plastomes sequenced in this study

| Category | *A. mongolicus*-ZW | *A. mongolicus*-NM | *A. nanus*-KS |
| --- | --- | --- | --- |
| Accession number | OQ927239 | OQ927238 | OQ927237 |
| Genome size (bp) | 153,812 | 153,921 | 153,830 |
| LSC length (bp) | 83,766 | 83,925 | 83,889 |
| SSC length (bp) | 18,016 | 18,020 | 18,005 |
| IR length (bp) | 26,015 | 25,988 | 25,968 |
| Number of genes | 110 (19) | 110 (19) | 110 (19) |
| Number of protein-coding genes | 77 (8) | 77(8) | 77 (8) |
| Number of tRNA genes | 29 (7) | 29 (7) | 29 (7) |
| Number of rRNA genes | 4 (4) | 4 (4) | 4(4) |
| GC content (%) | 36.9 | 36.9 | 36.9 |
| GC content in LSC (%) | 34.6 | 34.6 | 34.5 |
| GC content in SSC (%) | 30.5 | 30.5 | 30.6 |
| GC content in IR (%) | 42.8 | 42.8 | 42.8 |
