# Supplementary material for: Phylogeny of the tribe Sophoreae (Fabaceae, Faboideae) and taxonomy of Ammopiptanthus using plastome data
Source: Research Square preprint supplement (doi:10.21203/rs.3.rs-3300632/v1), 2023-08-31
Supplement: Supplementary file 2 [file d4d68058135d1648c434ca8a.docx]

Table S2. Genes contained in chloroplast genomes (110 genes in total).

| Category | Group of gene | Name of gene | | | |
| --- | --- | --- | --- | --- | --- |
| Self-replication | Ribosomal RNA genes | *rrn*4.5a | *rrn*5a | *rrn*16a | *rrn*23a |
|  | Transfer RNA genes | *trnA*-UGCa*  *trnF-*GAA  *trnI-*CAUa  *trnL-*UAA*  *trnP-*UGG *trnS-*GCU  *trnT-*UGU  *trnY-*GUA | *trnC-*GCA  *trnfM*-CAU  *trnI-*GAUa*  *trnL-*UAG *trnQ-*UUG  *trnS-*GGA  *trnV-*GACa | *trnD-*GUC  *trnG-*UCC  *trnK-*UUU*  *trnM-*CAU *trnR-*ACGa  *trnS-*UGA *trnV-*UAC* | *trnE-*UUC  *trnH-*GUG  *trnL-*CAAa  *trnN-*GUUa  *trnR-*UCU *trnT-*GGU  *trnW-*CCA |
|  | Small subunit of ribosome | *rps*2  *rps*8  *rps*15 | *rps*3  *rps*11  *rps*18 | *rps*4  *rps*12a,b*  *rps*19 | *rps*7a  *rps*14 |
|  | Large subunit of ribosome | *rpl*2a*  *rpl*23a | *rpl*14  *rpl32* | *rpl*16  *rpl*33 | *rpl*20  *rpl*36 |
|  | RNA polymerase subunits | *rpo*A | *rpo*B | *rpo*C1* | *rpo*C2 |
| Photosynthesis | Subunits of photosystem I | *psa*A  *psa*J | *psa*B  *ycf*3** | *psa*C | *psa*I |
|  | Subunits of photosystem II | *psb*A  *psb*E  *psb*J  *psb*N | *psb*B  *psb*F  *psb*K  *psb*T | *psb*C  *psb*H  *psb*L  *psb*Z | *psb*D  *psb*I  *psb*M |
|  | Subunits of cytochrome | *pet*A  *pet*L | *pet*B  *pet*N | *pet*D | *pet*G |
|  | Subunits of ATP synthase | *atp*A  *atp*H | *atp*B  *atp*I | *atp*E | *atp*F* |
|  | Large subunit of Rubisco | *rbc*L |  |  |  |
|  | Subunits of NADH  Dehydrogenase | *ndh*A*  *ndh*E  *ndh*I | *ndh*Ba*  *ndh*F  *ndh*J | *ndh*C  *ndh*G  *ndh*K | *ndh*D  *ndh*H |
| Other genes | Maturase | *mat*K |  |  |  |
|  | Envelope membrane protein | *cem*A |  |  |  |
|  | Subunit of acetyl-CoA | *acc*D |  |  |  |
|  | C-type cytochrome  synthesis gene | *ccs*A |  |  |  |
|  | Protease | *clp*P** |  |  |  |
| Unknown function | Conserved open reading frames | *ycf*1a (part) | *ycf*2a | *ycf*4 | *ycf*15a |

a Two gene copies in IRs; b gene divided into two independent transcription units; one and two asterisks indicate one- and two-intron containing genes, respectively.
